# Supplementary material for: The design of new magnetic-photocatalyst nanocomposites (CoFe2O4–TiO2) as smart nanomaterials for recyclable-photocatalysis applications
Source: Royal Society of Chemistry journal article supplement (doi:10.1039/c5nj02496j), 2015-10-19
Supplement: c5nj02496j1.pdf [file c5nj02496j1.pdf]

## Electronic Supporting Information

---

### **Design of New Magnetic-Photocatalyst Nanocomposites (CoFe<sub>2</sub>O<sub>4</sub>-TiO<sub>2</sub>) as Smart Nanomaterials for Recyclable-Photocatalysis Application**

Choonyian Haw,<sup>a</sup> Weesiong Chiu,<sup>\*a</sup> Saadah Abdul Rahman,<sup>a</sup> Poisim Khiew,<sup>b</sup> Shahidan Radiman,<sup>c</sup>  
Roslan Abdul Shukor,<sup>c</sup> Muhammad Azmi Abdul Hamid,<sup>c</sup> and Naziri Ghazali<sup>d</sup>

<sup>a</sup>Low Dimensional Materials Research Centre, Department of Physics, University of Malaya, 50603  
Kuala Lumpur, Malaysia.

<sup>b</sup>Department of Chemical Engineering, Faculty of Engineering, University of Nottingham Malaysia  
Campus, Jalan Broga, 43500 Semenyih, Selangor Darul Ehsan, Malaysia.

<sup>c</sup>School of Applied Physics, Faculty of Science and Technology, Universiti Kebangsaan Malaysia,  
43600 UKM Bangi, Selangor Darul Ehsan, Malaysia.

<sup>d</sup>Naz Scientific Sdn. Bhd, No. 14B, ½ Road, Kajang Teknologi Town, Section 1, 43500 Semenyih,  
Selangor Darul Ehsan, Malaysia.

\*Corresponding author:

Wee Siong Chiu

Phone: +60 3 7967 4206

Fax: +60 3 7967 4146

Email address: w.s.chiu@um.edu.my

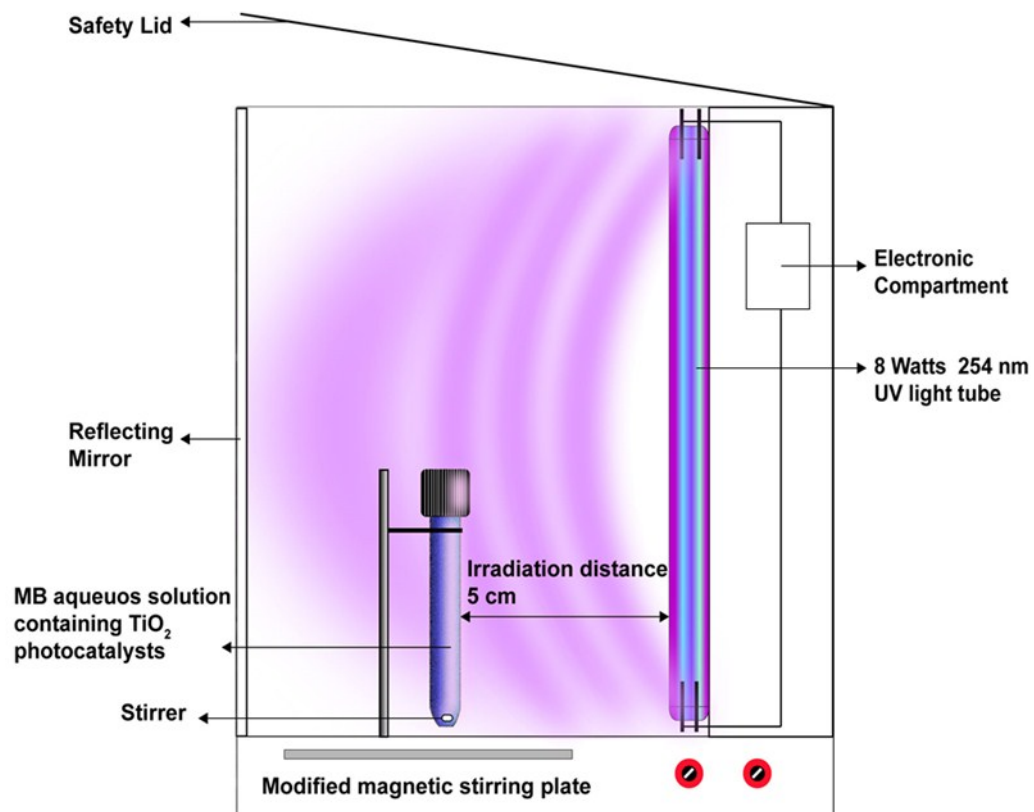

**Fig. S1** Schematic illustration of the photocatalytic reactor system

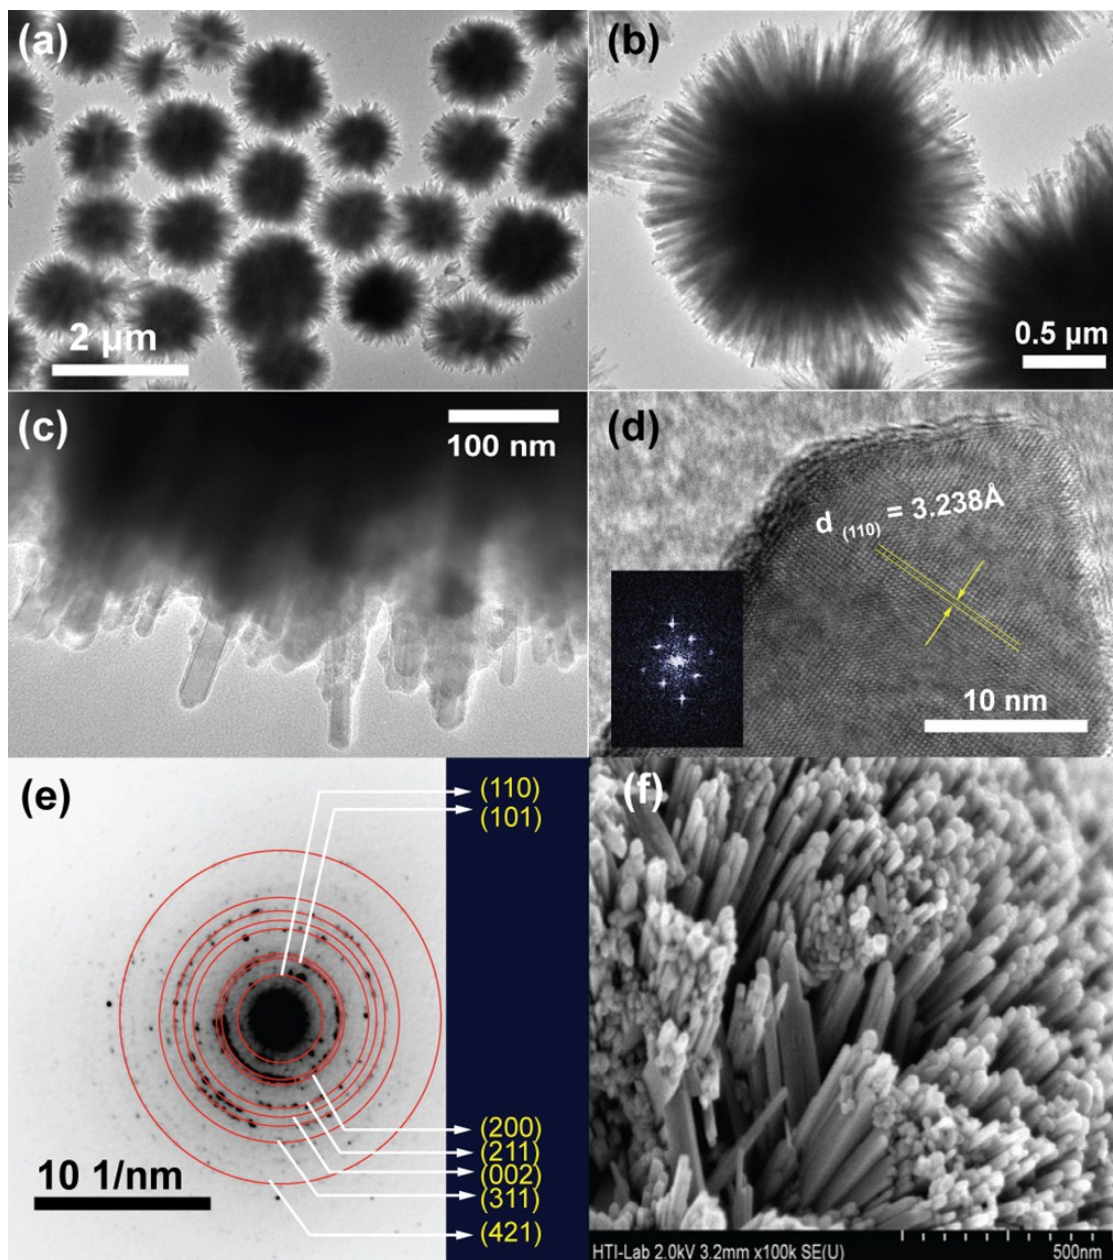

**Figure S2** TEM images of (a) 3D urchin-like  $\text{TiO}_2$  microspheres, (b) and (c) magnified section of a rear view of a selected  $\text{TiO}_2$  particle, (d) HRTEM image of the  $\text{TiO}_2$  microsphere with lattice spacing of 3.238 Å corresponds to (110) plane of rutile  $\text{TiO}_2$  and inset depicts the FFT generated from Fig. S2d, (e) indexed selected area electron diffraction (SAED) pattern of the red box region indicated in Fig. S2a and the corresponding intensity profile, (f) FESEM images of 3D  $\text{TiO}_2$  microspheres under x100k magnification.

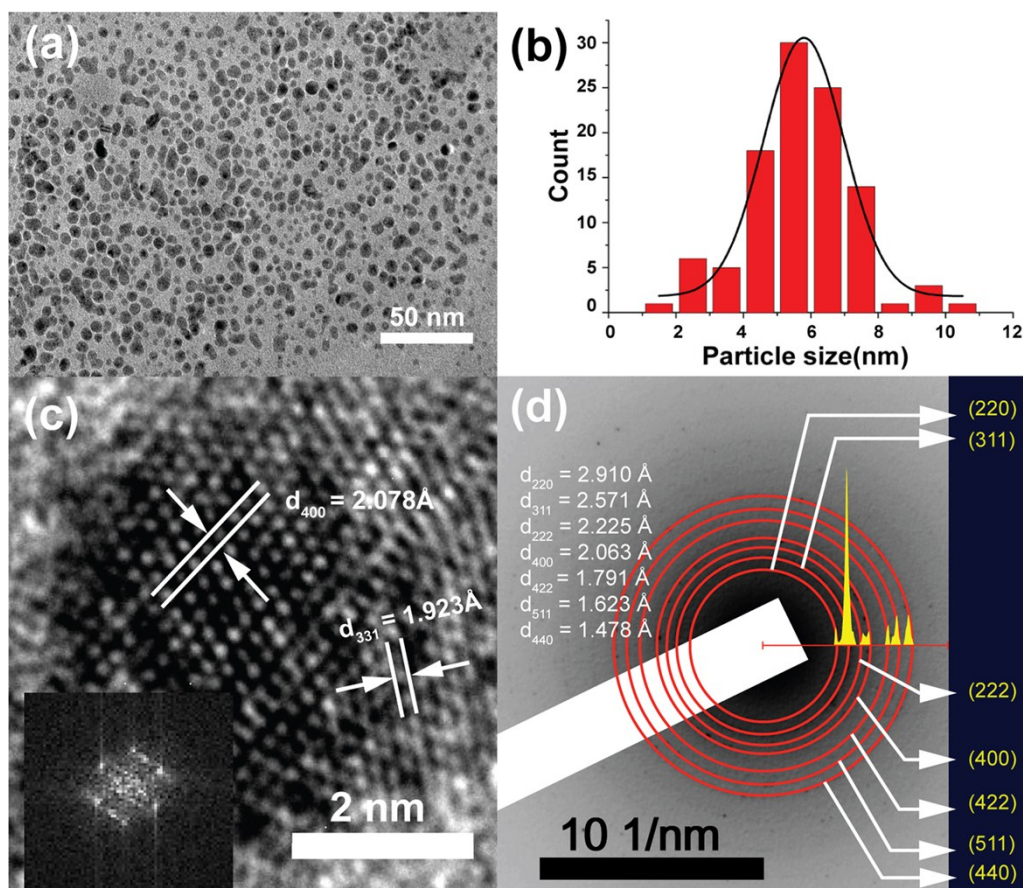

**Figure S3** (a) Low magnification view of  $\text{CoFe}_2\text{O}_4$  nanoparticles, (b) nanoparticle size distribution of  $5.79 \pm 1.19 \text{ nm}$  and with polydispersity of 20.56%, (c) high resolution TEM of the selected micrograph shown in (a) and inset depicts the corresponding FFT, (d) indexed SAED pattern and intensity profile of the selected micrograph region shown in (a)

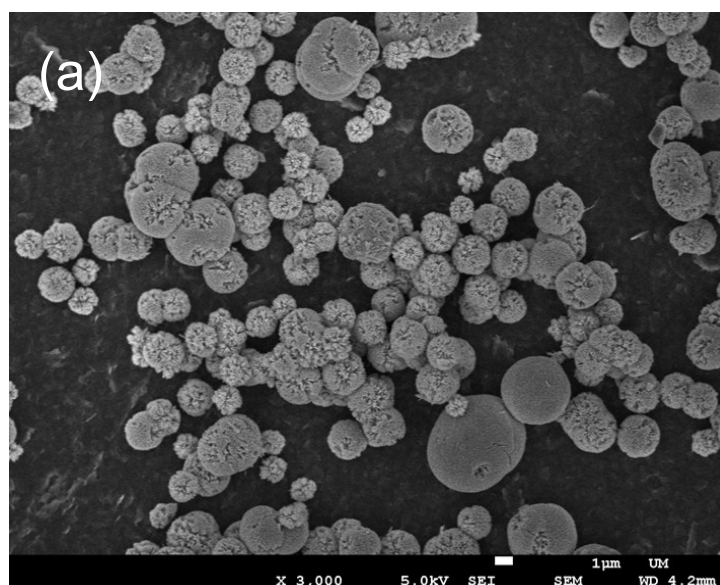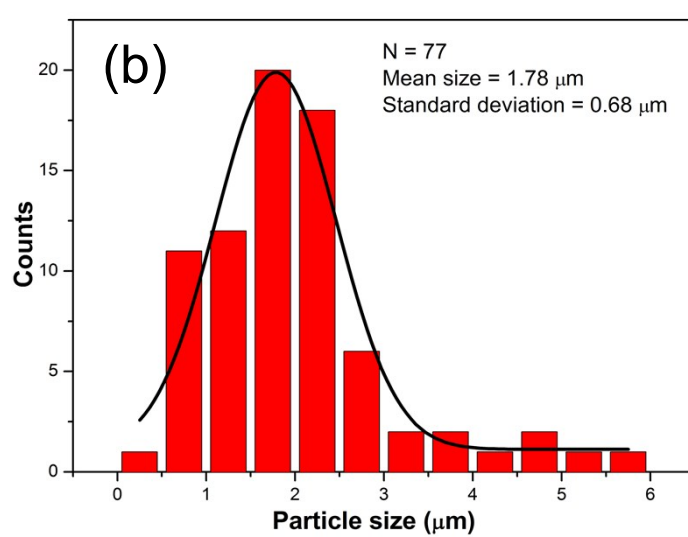

**Figure S4** FESEM images of (a) 3D urchin-like  $\text{TiO}_2$  microspheres and (b) wide size distribution of 3D urchin-like  $\text{TiO}_2$  microspheres with the average particle size is  $1.78 \pm 0.68 \mu\text{m}$ .
